# Supplementary material for: Txnip deletions and missense alleles prolong the survival of cones in a retinitis pigmentosa mouse model
Source: eLife. 2024 May 10;12:RP90749. doi: 10.7554/eLife.90749 (PMC11087050; doi:10.7554/eLife.90749)
Supplement: Figure 5—source data 1. [file elife-90749-fig5-data1.xlsx]

## Sheet: Sheet1
Figure 5D
Control	3875
Control	3966
Control	2953
Control	4671
Control	4409
Control	4634
Control	4571
Control	3627
Control	5144
Control	5327
Control	3630
Control	4378
Control	4696
Control	3962
Control	2777
Control	4231
Control	4248
Control	2534
Control	2570
Control	2920
Control	1646
Control	4029
Control	1565
Control	2962
Control	2835
Control	3183
Control	4879
Control	2589
Control	2831
Control	3353
Control	3985
Control	3885
Control	3231
Control	3927
Control	2969
Control	2352
Control	4100
Control	2949
Control	1894
Control	2924
Control	2323
Control	3780
Control	5399
Control	4187
Control	4701
Control	2952
Control	3427
Control	3759
Control	4062
Control	3836
Control	4762
Control	4759
shHsp90ab1#a	4141
shHsp90ab1#a	5096
shHsp90ab1#a	4649
shHsp90ab1#a	5909
shHsp90ab1#a	4892
shHsp90ab1#a	4690
shHsp90ab1#a	6915
shHsp90ab1#a	6338
shHsp90ab1#a	4672
shHsp90ab1#a	4192
shHsp90ab1#a	6055
shHsp90ab1#a	6785
shHsp90ab1#a	6172
shHsp90ab1#a	3914
shHsp90ab1#a	6002
shHsp90ab1#a	5230
shHsp90ab1#a	5656
shHsp90ab1#a	4225
shHsp90ab1#a	3944
shHsp90ab1#a	5686
shHsp90ab1#a	4855
shHsp90ab1#a	6153
shHsp90ab1#a	3715
shHsp90ab1#b	2536
shHsp90ab1#b	3357
shHsp90ab1#b	2675
shHsp90ab1#b	2318
shHsp90ab1#b	3925
shHsp90ab1#b	2904
shHsp90ab1#b	4389
shHsp90ab1#b	5668
shHsp90ab1#b	5695
shHsp90ab1#b	4537
shHsp90ab1#b	5465
shHsp90ab1#b	4355
shHsp90ab1#b	4284
shHsp90ab1#b	3776
shHsp90ab1#b	4494
shHsp90ab1#c	4536
shHsp90ab1#c	4079
shHsp90ab1#c	3473
shHsp90ab1#c	4087
shHsp90ab1#c	2961
shHsp90ab1#c	2699
shHsp90ab1#c	3556
shHsp90ab1#c	3302
shHsp90ab1#c	4054
shHsp90ab1#c	5809
shHsp90ab1#c	5128
shHsp90ab1#c	5780
shHsp90ab1#c	6060
shHsp90ab1#c	4866
shHsp90ab1#c	6163
shHsp90ab1#c	5074
shHsp90ab1#c	5382
shHsp90ab1#c	4848
shHsp90ab1#c	4216
shHsp90ab1#c	4339
Figure 5F
Txnip.C247S	7675
Txnip.C247S	9016
Txnip.C247S	6628
Txnip.C247S	6544
Txnip.C247S	8941
Txnip.C247S	8589
Txnip.C247S	4915
Txnip.C247S	6789
Txnip.C247S	7006
Txnip.C247S	8352
Txnip.C247S	6176
Txnip.C247S	6264
Txnip.C247S	7055
Txnip.C247S	6494
Txnip.C247S	6115
Txnip.C247S	7293
Txnip.C247S+shHsp90ab1	8573
Txnip.C247S+shHsp90ab1	8477
Txnip.C247S+shHsp90ab1	8827
Txnip.C247S+shHsp90ab1	9852
Txnip.C247S+shHsp90ab1	9618
Txnip.C247S+shHsp90ab1	9324
Txnip.C247S+shHsp90ab1	8084
Txnip.C247S+shHsp90ab1	8477
Txnip.C247S+shHsp90ab1	7074
Txnip.C247S+shHsp90ab1	7338
Txnip.C247S+shHsp90ab1	7808
Txnip.C247S+shHsp90ab1	6257
Txnip.C247S+shHsp90ab1	9109
Txnip.C247S+shHsp90ab1	6687
Figure 5H
control	1378
control	1875
control	3778
control	1496
control	2499
control	1922
control	1517
control	1122
control	3009
control	3067
control	2085
control	1048
control	2906
shHsp90ab1	2446
shHsp90ab2	2166
shHsp90ab3	3313
shHsp90ab4	1137
shHsp90ab5	2226
shHsp90ab6	1202
shHsp90ab7	2298
shHsp90ab8	1994
shHsp90ab9	2365
shHsp90ab10	3633
shHsp90ab11	2026
shHsp90ab12	1237
shHsp90ab13	2004
Figure 5B
shNC	0.857081	0.762449	1.43415	1.16592	0.873453	1.1198	0.895141	0.892013
shHsp90ab1#a	0.624543	0.543503	0.504227	0.650726	0.524076	0.498018	0.588561	0.601735
shHsp90ab1#b	0.684318	0.902922	0.676633	0.948149	0.720515	0.714928	0.940528	0.732679
shHsp90ab1#c	0.529512	0.860507	0.729879	0.208565	0.508984	0.410254	0.425622	0.406993
